# Supplementary material for: Neuroprotective thiazole sulfonamides against 6-OHDA-induced Parkinsonian model: in vitro biological and in silico pharmacokinetic assessments
Source: Royal Society of Chemistry journal article supplement (doi:10.1039/d4ra04941a), 2025-01-01
Supplement: d4ra04941a1.pdf [file d4ra04941a1.pdf]

## ***Supporting Information***

### **Neuroprotective thiazole sulfonamides against 6-OHDA-induced Parkinsonian model: *in vitro* biological and *in silico* pharmacokinetic assessments**

Waralee Ruankham<sup>1,5</sup>, Ratchanok Pingaew<sup>2,\*</sup>, Veda Prachayasittikul<sup>1</sup>, Apilak Worachartcheewan<sup>3</sup>, Suphissara Sathuphong<sup>1</sup>, Setthawut Apiraksattayakul<sup>1</sup>, Tanawut Tantimongcolwat<sup>1</sup>, Virapong Prachayasittikul<sup>4</sup>, Supaluk Prachayasittikul<sup>1</sup>, Kamonrat Phopin<sup>1,4,\*</sup>

<sup>1</sup>Center for Research Innovation and Biomedical Informatics, Faculty of Medical Technology, Mahidol University, Bangkok 10700, Thailand

<sup>2</sup>Department of Chemistry, Faculty of Science, Srinakharinwirot University, Bangkok 10110, Thailand

<sup>3</sup>Department of Community Medical Technology, Faculty of Medical Technology, Mahidol University, Bangkok 10700, Thailand

<sup>4</sup>Department of Clinical Microbiology and Applied Technology, Faculty of Medical Technology, Mahidol University, Bangkok 10700, Thailand

<sup>5</sup>Department of Clinical Chemistry, Faculty of Medical Technology, Mahidol University, Bangkok 10700, Thailand.

\*Corresponding authors:

Ratchanok Pingaew, E-mail: [ratchanok@g.swu.ac.th](mailto:ratchanok@g.swu.ac.th)

Kamonrat Phopin, E-mail: [kamonrat.php@mahidol.ac.th](mailto:kamonrat.php@mahidol.ac.th), [kamonrat.php@mahidol.edu](mailto:kamonrat.php@mahidol.edu)

Phone: +66 (2) 441 4376, Fax: +66 (2) 441 4380

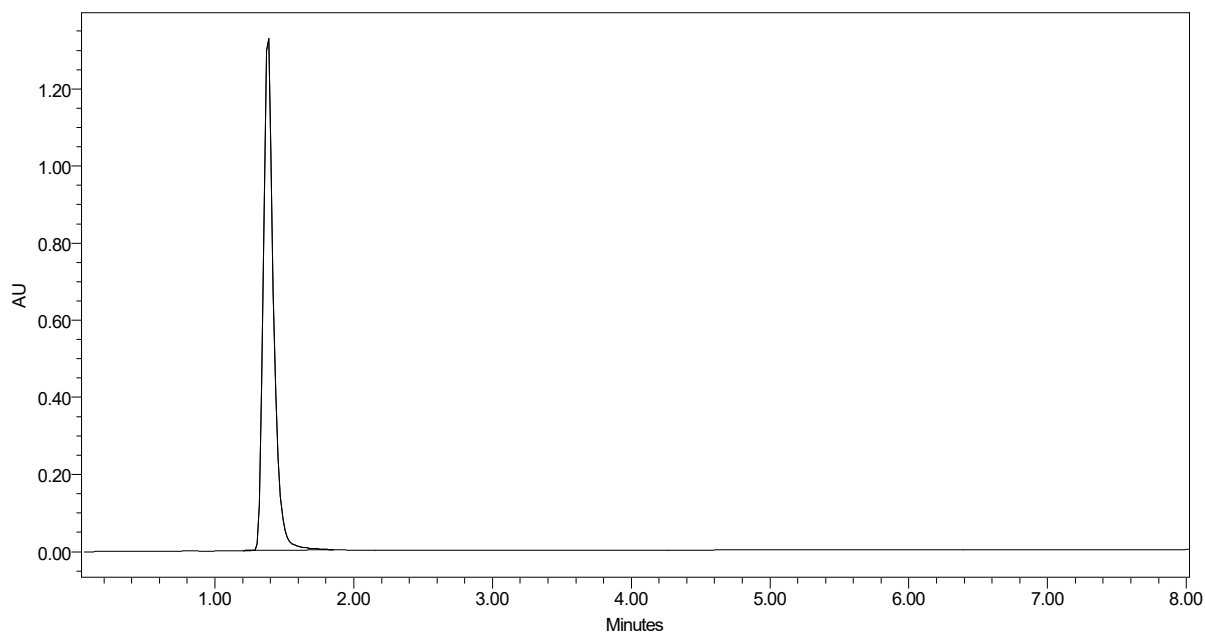

|   | RT    | Area    | % Area | Height  |
|---|-------|---------|--------|---------|
| 1 | 1.384 | 6869077 | 100.00 | 1318651 |

**Figure S1.** HPLC chromatogram of compound 1.

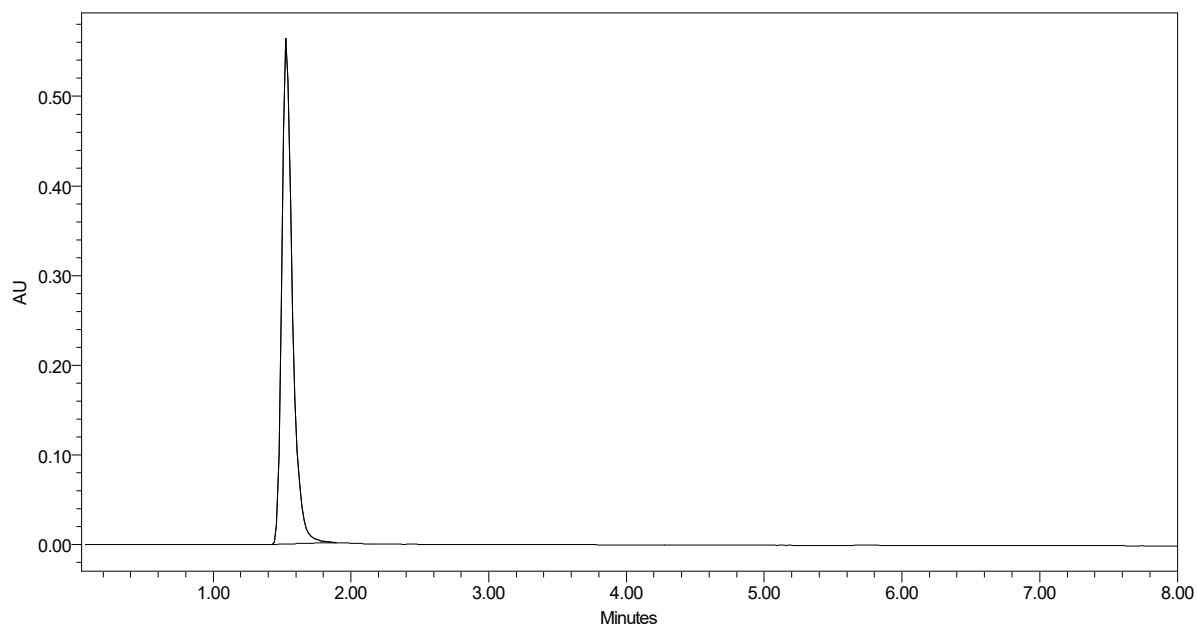

|   | RT    | Area    | % Area | Height |
|---|-------|---------|--------|--------|
| 1 | 1.531 | 3015380 | 100.00 | 557457 |

**Figure S2.** HPLC chromatogram of compound 2.

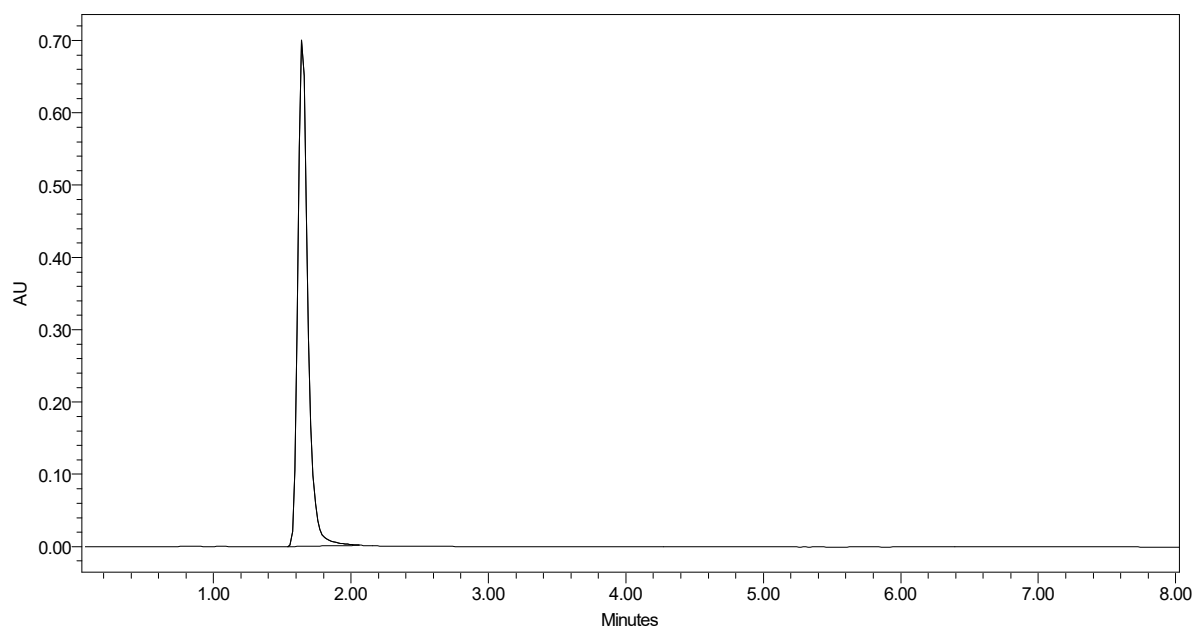

|   | RT    | Area    | % Area | Height |
|---|-------|---------|--------|--------|
| 1 | 1.646 | 3545595 | 100.00 | 692796 |

**Figure S3.** HPLC chromatogram of compound 3.

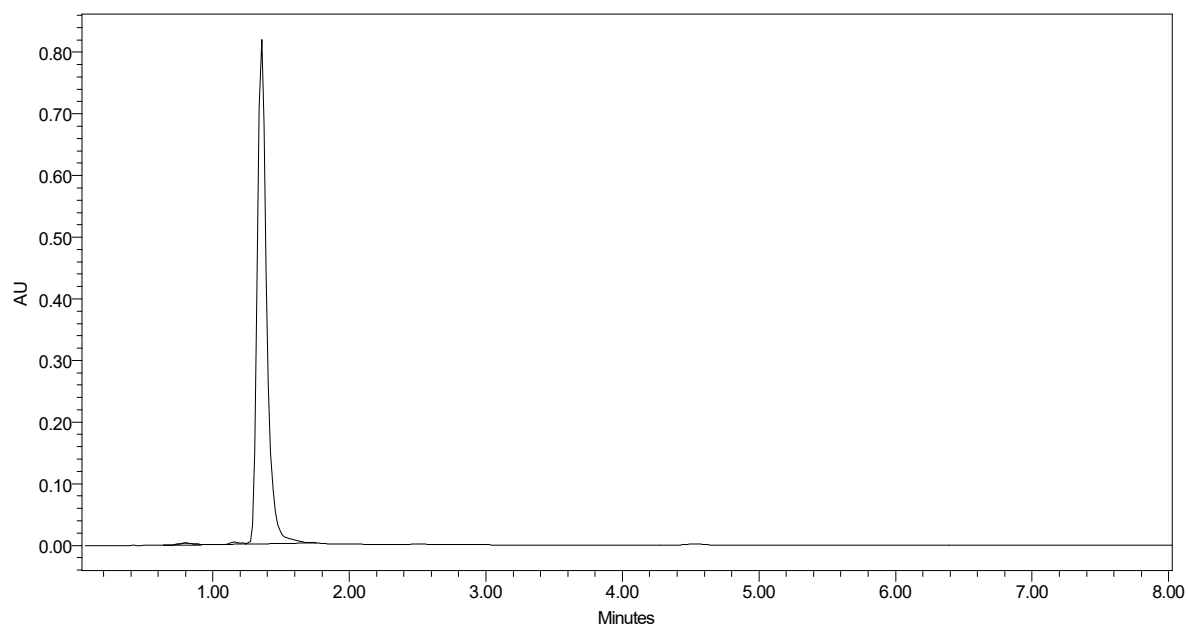

|   | RT    | Area    | % Area | Height |
|---|-------|---------|--------|--------|
| 1 | 0.805 | 23824   | 0.60   | 3052   |
| 2 | 1.160 | 21262   | 0.54   | 3725   |
| 3 | 1.358 | 3928473 | 98.87  | 800469 |

**Figure S4.** HPLC chromatogram of compound 4.

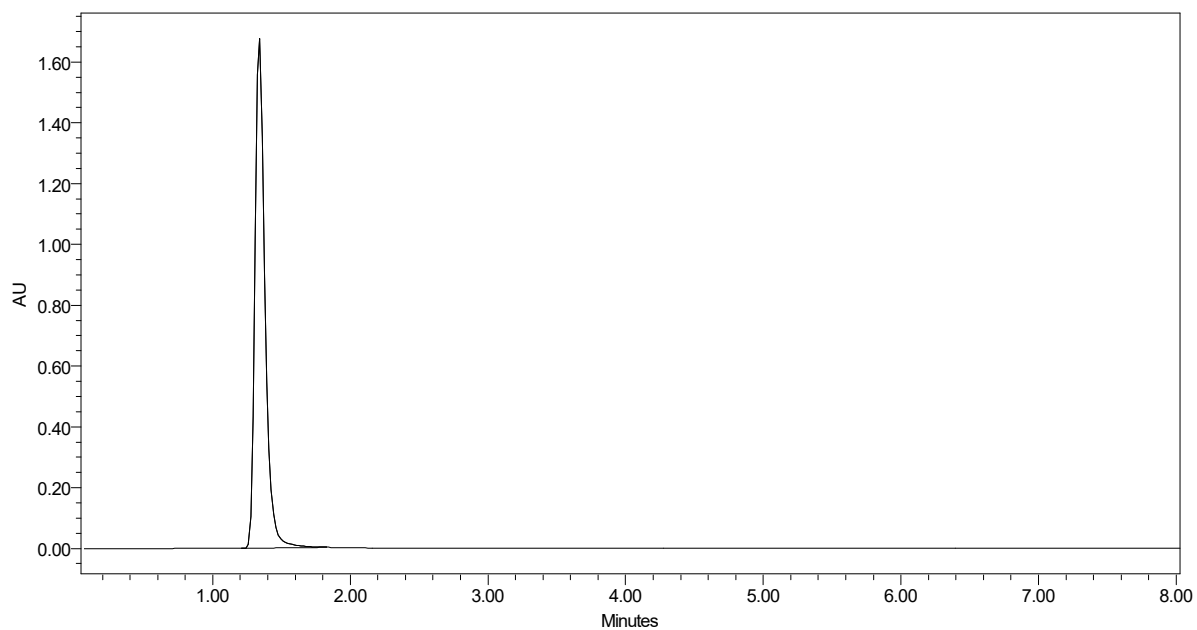

|   | RT    | Area    | % Area | Height  |
|---|-------|---------|--------|---------|
| 1 | 1.341 | 8491344 | 100.00 | 1650231 |

**Figure S5.** HPLC chromatogram of compound **5**.

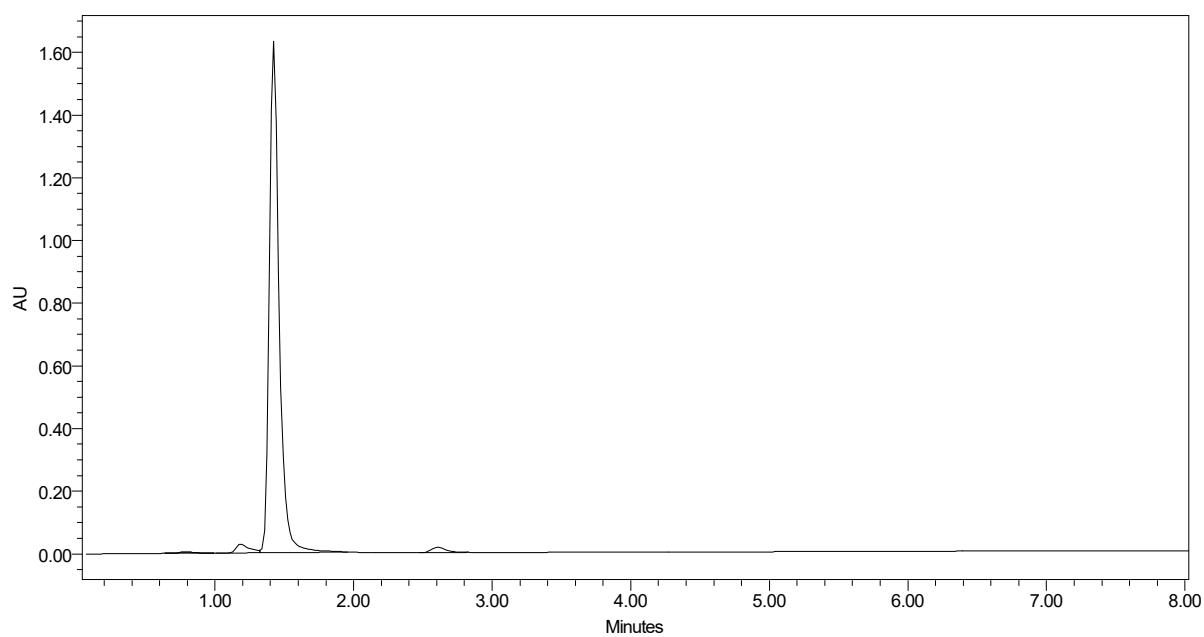

|   | RT    | Area    | % Area | Height  |
|---|-------|---------|--------|---------|
| 1 | 0.792 | 35551   | 0.43   | 4834    |
| 2 | 1.191 | 193943  | 2.34   | 27940   |
| 3 | 1.425 | 7960879 | 95.85  | 1597521 |
| 4 | 2.610 | 115334  | 1.39   | 17107   |

**Figure S6.** HPLC chromatogram of compound **6**.

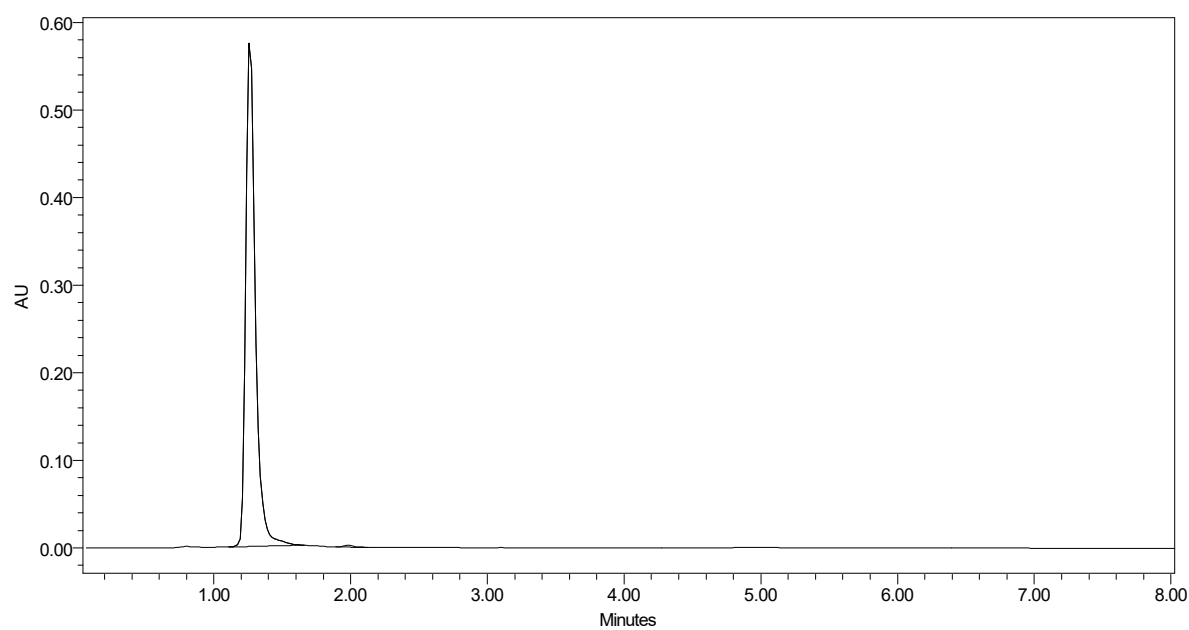

|   | RT    | Area    | % Area | Height |
|---|-------|---------|--------|--------|
| 1 | 1.264 | 2820832 | 99.61  | 570393 |
| 2 | 1.985 | 11097   | 0.39   | 2103   |

**Figure S7.** HPLC chromatogram of compound 7.

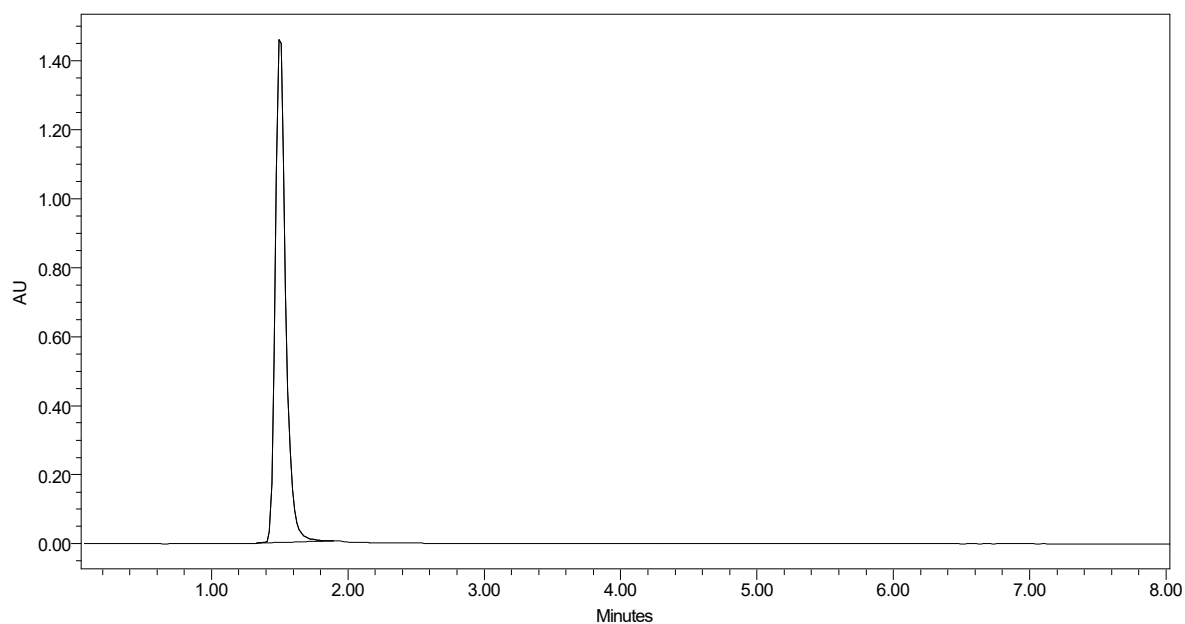

|   | RT    | Area    | % Area | Height  |
|---|-------|---------|--------|---------|
| 1 | 1.502 | 7701007 | 100.00 | 1468247 |

**Figure S8.** HPLC chromatogram of compound 8.

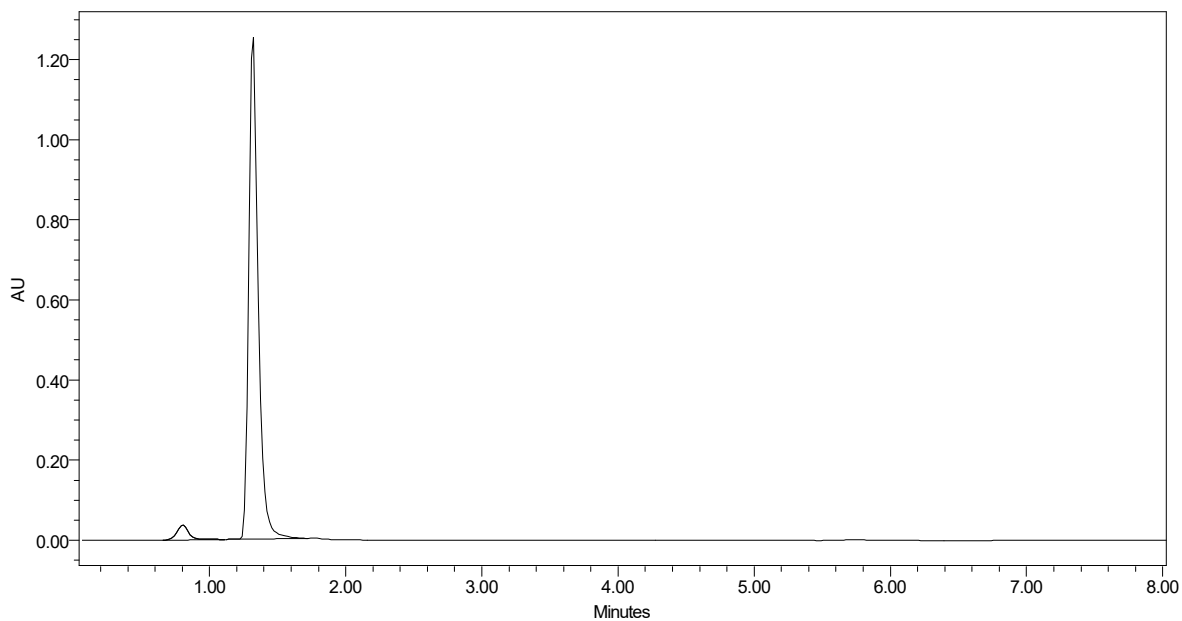

|   | RT    | Area    | % Area | Height  |
|---|-------|---------|--------|---------|
| 1 | 0.804 | 226174  | 3.56   | 37219   |
| 2 | 1.321 | 6122434 | 96.44  | 1238673 |

**Figure S9.** HPLC chromatogram of compound **9**.

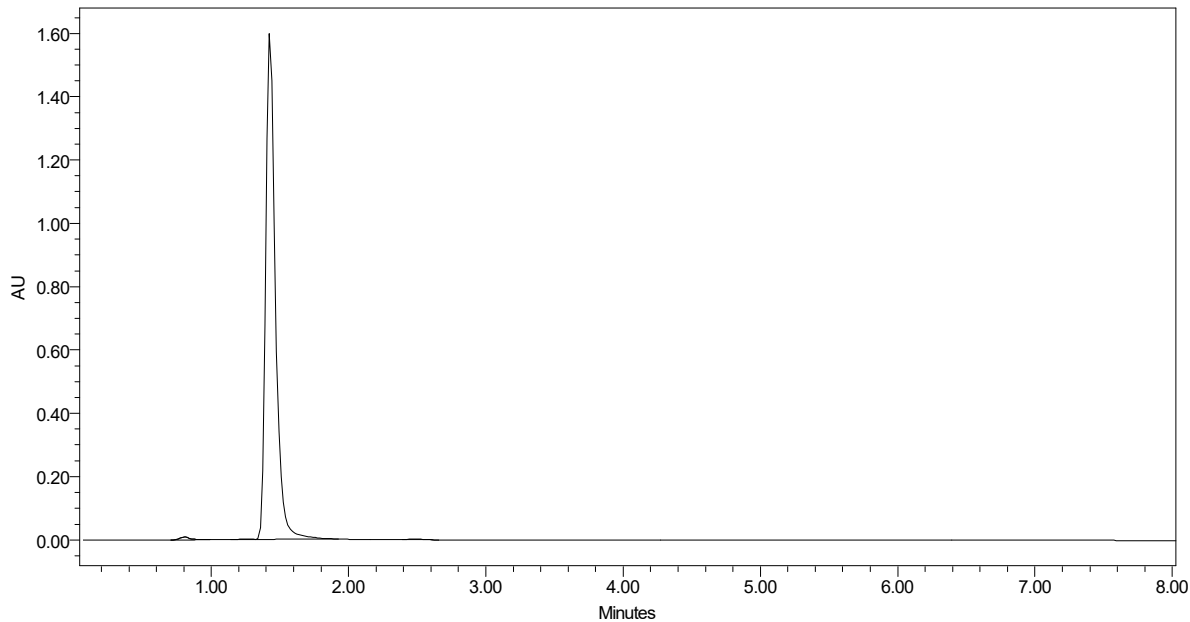

|   | RT    | Area    | % Area | Height  |
|---|-------|---------|--------|---------|
| 1 | 0.801 | 52444   | 0.67   | 9174    |
| 2 | 1.429 | 7791447 | 99.11  | 1571975 |
| 3 | 2.487 | 17194   | 0.22   | 2891    |

**Figure S10.** HPLC chromatogram of compound **10**.

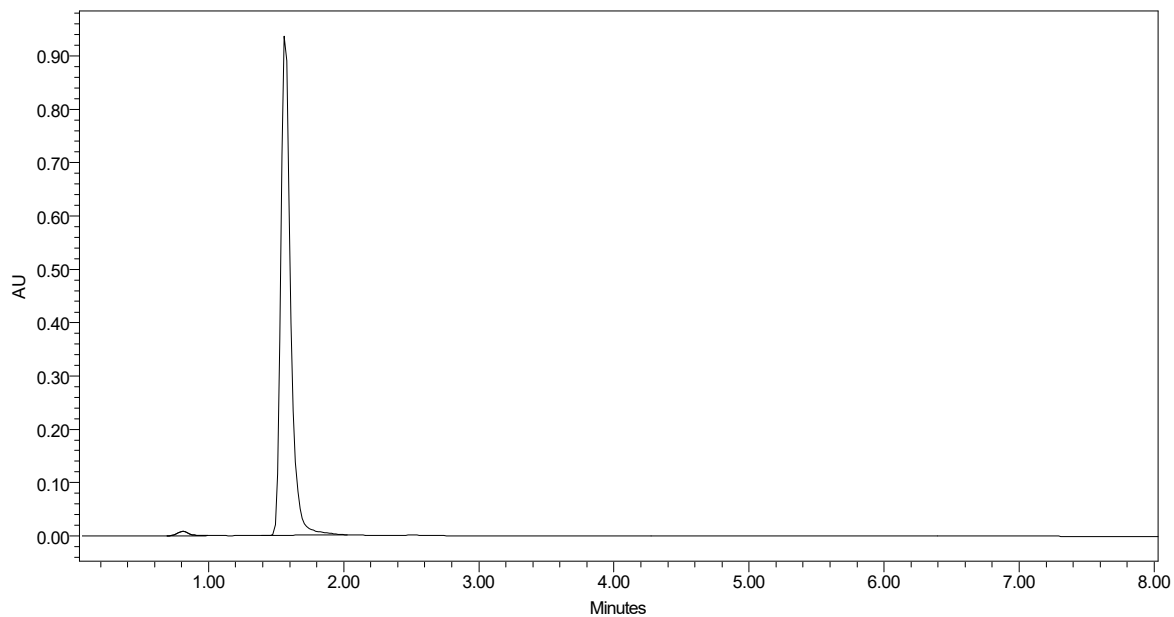

|   | RT    | Area    | % Area | Height |
|---|-------|---------|--------|--------|
| 1 | 0.810 | 50506   | 1.06   | 8557   |
| 2 | 1.566 | 4735578 | 98.94  | 929804 |

**Figure S11.** HPLC chromatogram of compound **11**.

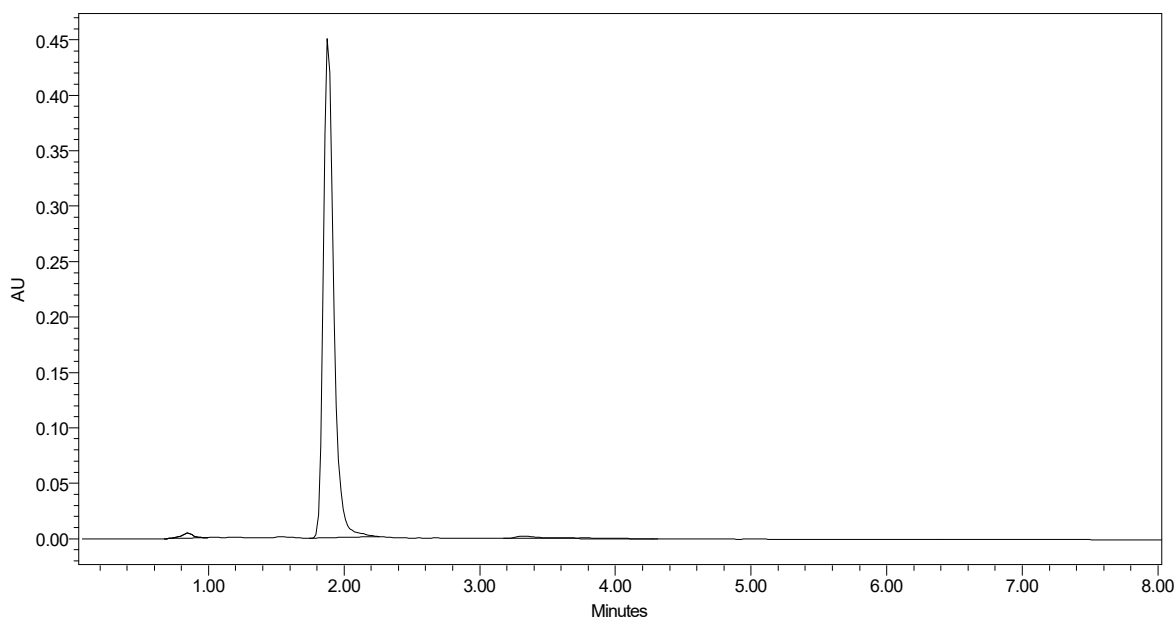

|   | RT    | Area    | % Area | Height |
|---|-------|---------|--------|--------|
| 1 | 0.846 | 27549   | 1.12   | 4481   |
| 2 | 1.881 | 2382857 | 97.16  | 446117 |
| 3 | 3.325 | 42106   | 1.72   | 2255   |

**Figure S12.** HPLC chromatogram of compound **12**.
